# Supplementary material for: Transformer-based Deep Learning Model Using Contrast-enhanced US for Predicting Malignancy in Breast Nodules: A Two-center Study
Source: Research Square preprint supplement (doi:10.21203/rs.3.rs-8005283/v1), 2025-12-02
Supplement: Supplementary file 1 [file 5d7d62e2316dffcbce8ed040.docx]

**Fig. 1** Flowchart of study Inclusion and Exclusion. Institution 1, Shenzhen Hospital of Southern Medical University; Institution 2, Southern University of Science and Technology Hospital; CEUS, contrast-enhanced ultrasound

**Fig. 2** Architecture of the MultiChannel 2.5D Transformer model proposed in this study. The five contrast-enhanced images on the left represent key frame slices from the contrast-enhanced ultrasound video.

**Fig. 3** Overview of the study workflow. Steps 1-4 outline the sequential process of ROI segmentation, model training, and integration for the 2D DL, Clinical, and MultiChannel 2.5D_DL models, leading to a combined model, alongside performance evaluations via ROC curves, DCA curves, and Delong tests for assessing malignancy prediction in breast nodules. 2D 2-dimensional, 2.5D 2.5-dimensional, ROI, region of interest; DL, deep learning; ROC, receiver operating characteristic; DCA, decision curve analysis

**Fig. 4** ROC curves and DeLong tests in the study cohorts. Panels (a–c) illustrate the ROC curves for the models in the training, internal validation, and external validation cohorts, respectively. Panels (d–f) show DeLong tests comparing the models between cohorts. 2D 2-dimensional, 2.5D 2.5-dimensional, ROC, receiver operating characteristic; DL, deep learning

**Fig. 5** Calibration and DCA curves in the study cohorts. Panels (a–c) illustrate the calibration curves for the models in the training, internal validation, and external validation cohorts, respectively; the black diagonal line represents ideal calibration, with greater proximity indicating superior model performance. Panels (d–f) show the DCA curves for the models across cohorts. 2D 2-dimensional, 2.5D 2.5-dimensional, DCA, decision curve analysis; DL, deep learning.

**Fig. 6** Grad-CAM visualizations of a representative sample, illustrating the MultiChannel 2.5D_DL model's selective focus on image regions for prediction. Red areas denote heightened model attention, indicating enhanced prognostic value for response prediction. 2.5D 2.5-dimensional, Grad-CAM, gradient-weighted class activation mapping; DL, deep learning
